# Supplementary material
Source: Research Square preprint supplement (doi:10.21203/rs.3.rs-9384517/v1)

**The full length uncropped original western blots**

Ctrl MSC-primed Mφ L-MSC-primed Mφ Anti-IL6+L-MSC-primed Mφ

**GAPDH**


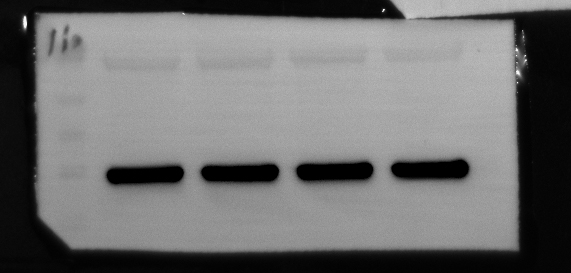


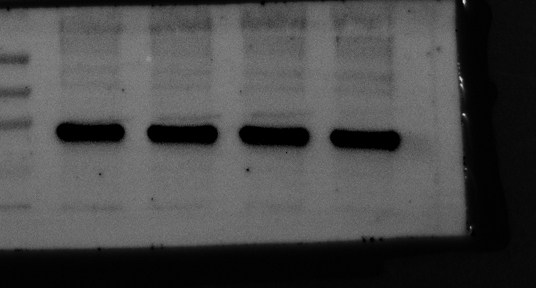

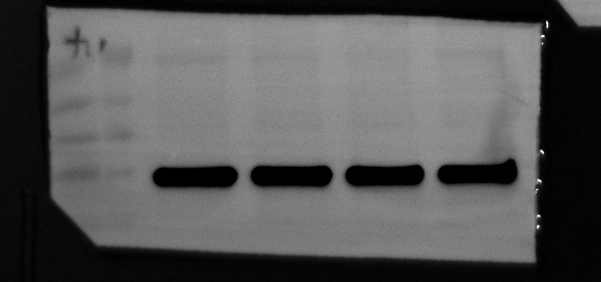


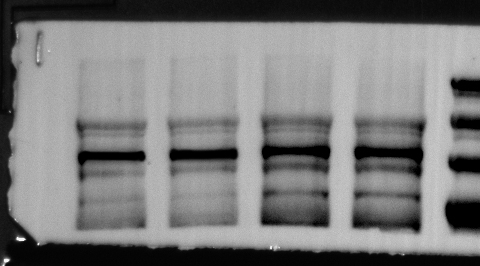

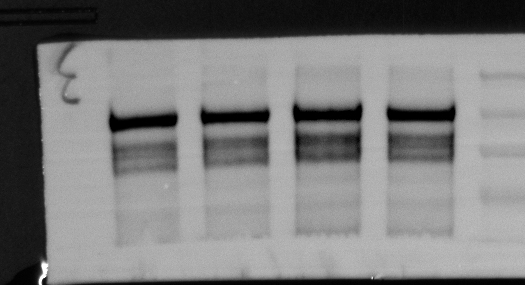

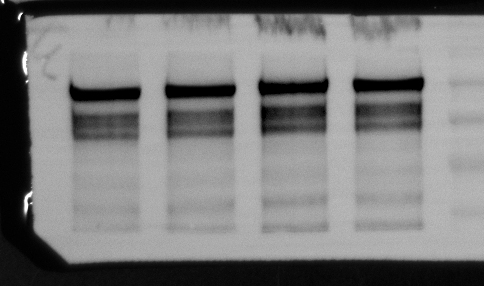
**JAK2**


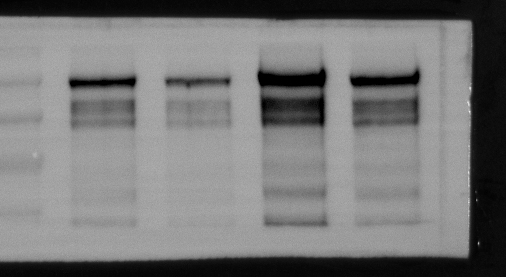
**p-JAK2**


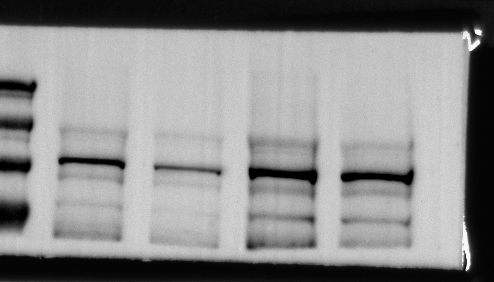

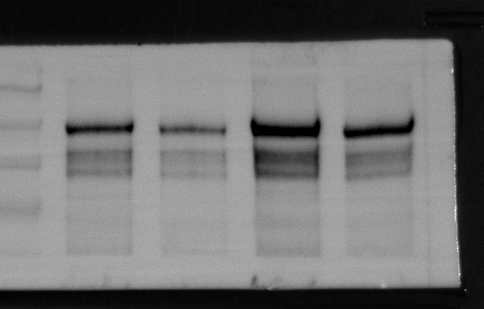


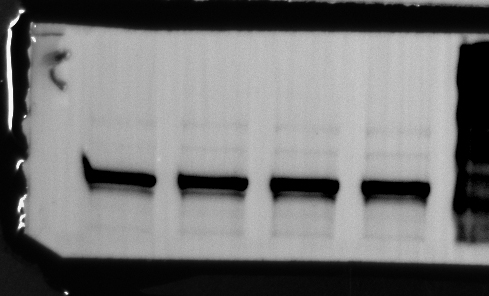
**STAT3**


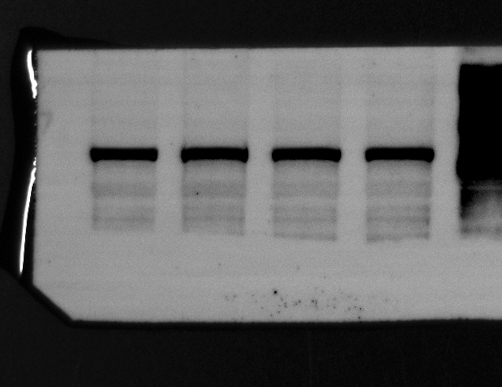


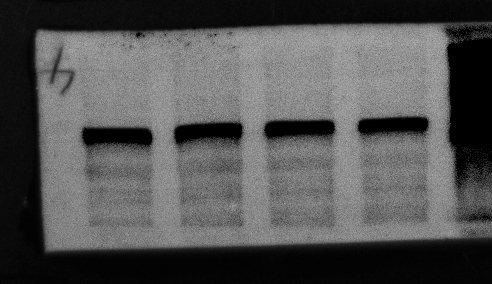


**p-STAT3**


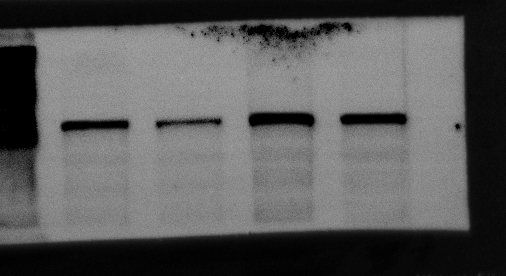

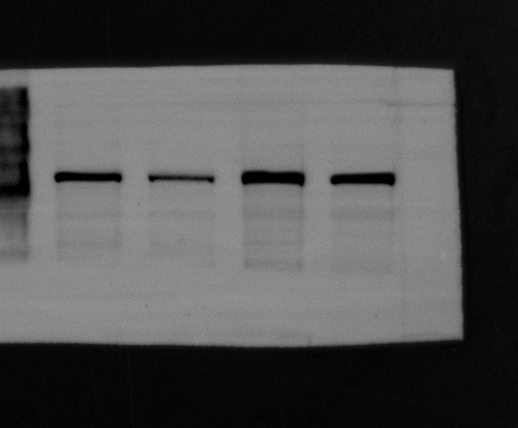

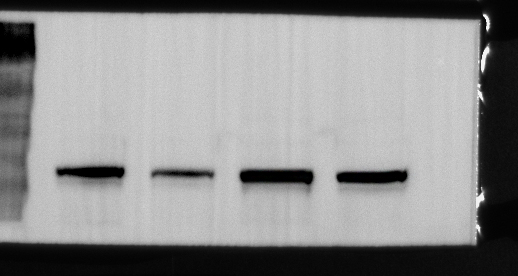

Supplement: Supplementary file 1 [file c58293bf1adb8fab16ccbf0c.docx]
